# Supplementary material for: Magnesium lactate in the treatment of Gitelman syndrome: patient-reported outcomes
Source: PubMed Central journal article supplement (PMC5837242; doi:10.1093/ndt/gfw019), 2016-03-03
Supplement: gfw019_supp.pdf [file gfw019_supp.pdf]

| Patient | Pre-SRMgL form of Mg therapy | Daily no. Mg tabs § |            | Daily mEq Mg |       | Serum K (mmol/L) |             | Serum Mg (mmol/L) |             |
|---------|------------------------------|---------------------|------------|--------------|-------|------------------|-------------|-------------------|-------------|
|         |                              | Pre-SRMgL           | SRMgL      | Pre-SRMgL    | SRMgL | Pre-SRMgL        | SRMgL       | Pre-SRMgL         | SRMgL       |
| 1       | Glycerophosphate             | 4                   | 4          | 32           | 28    | <b>3.31</b>      | <b>3.65</b> | <b>0.64</b>       | <b>0.64</b> |
| 2       | Glycerophosphate             | 6                   | 4          | 48           | 28    | 2.87             | <b>3.34</b> | <b>0.61</b>       | <b>0.62</b> |
| 3       | Nil                          | 0                   | 2          | 0            | 14    | <b>3.35</b>      | <b>3.33</b> | <b>0.62</b>       | <b>0.65</b> |
| 4       | Chloride/Aspartate           | Intolerant          | 2          | 0            | 14    | 2.58             | 2.59        | <b>0.77</b>       | <b>0.75</b> |
| 5       | Glycerophosphate             | 8                   | 12#        | 64           | 84    | <b>3.28</b>      | <b>3.64</b> | 0.49              | 0.50        |
| 6*      | Glycerophosphate             | 16                  | 8+8        | 128          | 120   | <b>4.47</b>      | <b>4.20</b> | <b>0.62</b>       | 0.58        |
| 7       | Chloride                     | 6                   | 6          | 48           | 42    | 2.80             | <b>3.08</b> | 0.53              | <b>0.63</b> |
| 8       | Glycerophosphate             | 13                  | 10         | 104          | 70    | <b>3.56</b>      | <b>3.81</b> | 0.56              | <b>0.64</b> |
| 9       | Glycerophosphate             | 12                  | 12         | 96           | 84    | <b>3.25</b>      | <b>3.32</b> | 0.42              | 0.48        |
| 10      | Glycerophosphate             | 6                   | 6          | 48           | 42    | 3.16             | <b>3.36</b> | <b>0.78</b>       | <b>0.70</b> |
| 11      | Oxide/Glycerophosphate       | 6                   | 4          | 48           | 28    | <b>3.55</b>      | <b>3.62</b> | <b>0.66</b>       | <b>0.68</b> |
| 12      | Glycerophosphate             | 9                   | 6          | 72           | 42    | 2.75             | <b>3.28</b> | 0.55              | <b>0.64</b> |
| 13      | Glycerophosphate             | 25                  | 10         | 200          | 70    | <b>4.33</b>      | <b>4.48</b> | <b>0.67</b>       | <b>0.66</b> |
| 14**    | Chloride/Glycinate           | 6                   | 6          | 48           | 42    | <b>4.05</b>      | <b>3.79</b> | <b>0.75</b>       | <b>0.66</b> |
| 15      | Glycerophosphate             | 9                   | 6          | 72           | 42    | 2.92             | <b>3.53</b> | 0.55              | 0.56        |
| 16*     | Glycerophosphate             | 32                  | 8+8        | 256          | 120   | 2.92             | <b>3.28</b> | 0.58              | 0.57        |
| 17      | Glycerophosphate             | 4                   | 2          | 32           | 14    | 2.97             | <b>3.97</b> | <b>0.65</b>       | <b>0.65</b> |
| 18      | Glycerophosphate             | 16                  | 12         | 128          | 84    | <b>3.28</b>      | <b>3.56</b> | <b>0.66</b>       | <b>0.68</b> |
| 19      | Glycerophosphate             | N/K                 | 8          | N/K          | 56    | <b>3.20</b>      | 3.19        | 0.51              | 0.56        |
| 20      | Glycerophosphate             | Intolerant          | 9          | N/K          | 63    | 2.89             | <b>3.44</b> | 0.55              | <b>0.60</b> |
| 21      | Nil                          | 0                   | 6          | 0            | 42    | <b>3.30</b>      | <b>3.20</b> | 0.59              | <b>0.68</b> |
| 22      | Glycerophosphate             | 24                  | 5          | 192          | 35    | 3.11             | <b>3.20</b> | <b>0.61</b>       | 0.59        |
| 23      | Chloride/Glycerophosphate    | 4                   | 4          | 32           | 28    | <b>3.45</b>      | <b>3.58</b> | <b>0.61</b>       | <b>0.67</b> |
| 24      | Nil                          | 0                   | 2          | 0            | 14    | 3.18             | N/A         | <b>0.66</b>       | N/A         |
| 25      | Glycerophosphate             | N/K                 | 8          | N/K          | 56    | N/A              | N/A         | N/A               | N/A         |
| 26      | Glycerophosphate             | 6                   | Intolerant | 48           | 0     | 2.93             |             | 0.58              |             |
| 27      | Glycerophosphate             | 4                   | Intolerant | 32           | 0     | <b>4.01</b>      |             | <b>0.67</b>       |             |
| 28      | Glycerophosphate             | 6                   | Intolerant | 48           | 0     | <b>3.39</b>      |             | <b>0.67</b>       |             |

\* Patients took 8 SRMgL in combination with 8 Glycerophosphate

Data in **bold** are at least at our treatment target level

\*\* Patient able to discontinue Amiloride

§ Data extracted from most recent medical record

# Tried dose up to 18 tabs but diarrhea then led to dose reduction

N/A Insufficient data

N/K Not known
